# Supplementary material for: Anion Exchange Affinity-Based Controllable Surface Imprinting Synthesis of Ultrathin Imprinted Films for Protein Recognition
Source: MDPI journal article supplement (doi:10.3390/polym14102011), 2022-05-14
Supplement: s1 [file s1]

## Supporting Information

### Anion exchange affinity-based controllable surface imprinting synthesis of ultra-thin imprinted films for protein recognition

Renyuan Song<sup>1\*</sup>, XiaoFeng Yu<sup>1,2</sup>, Muxin Liu<sup>1</sup>, Xiaoling Hu<sup>3</sup>, Shengqing Zhu<sup>1</sup>

<sup>1</sup> School of Materials and Chemical Engineering, Bengbu University, Bengbu 233030, P. R. China; schemistry01@163.com (M.L.); yuxfchem@126.com(S.Z.)

<sup>2</sup> Bengbu Product Quality and Inspection Institute, Bengbu, Anhui 233030, P. R. China; yuxfchemistry@163.com (X.Y.)

<sup>3</sup> School of Chemistry and Chemical Engineering, Northwestern Polytechnical University, Xi'an 710129, P. R. China; shichemistry@126.com(X.H.)

\* Correspondence: feiyu@mail.ustc.edu.cn (R.S.)

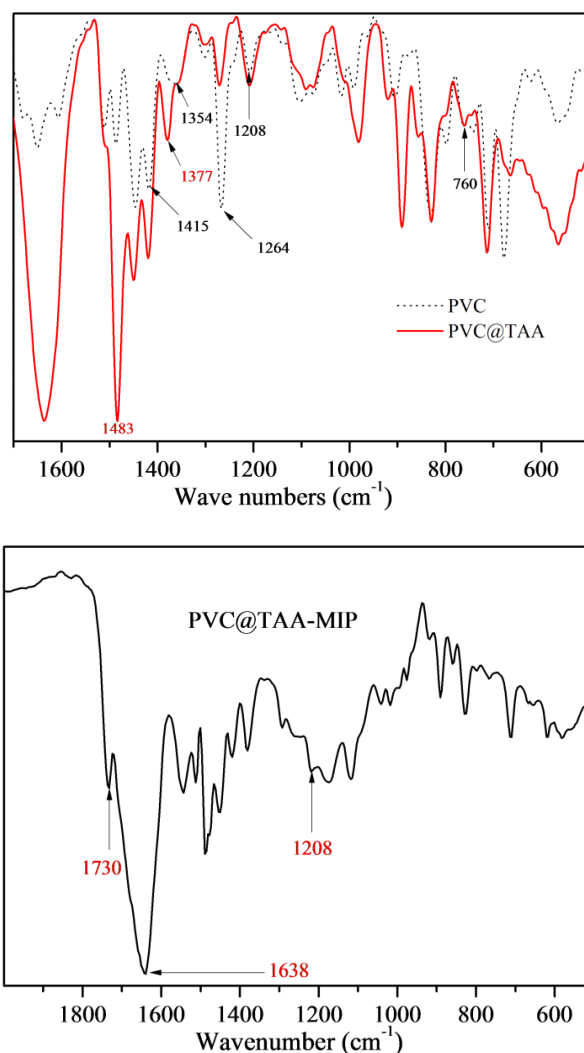

**Figure S1.** FT-IR spectra of PVC, PVC@TAA and PVC@TAA-MIP.

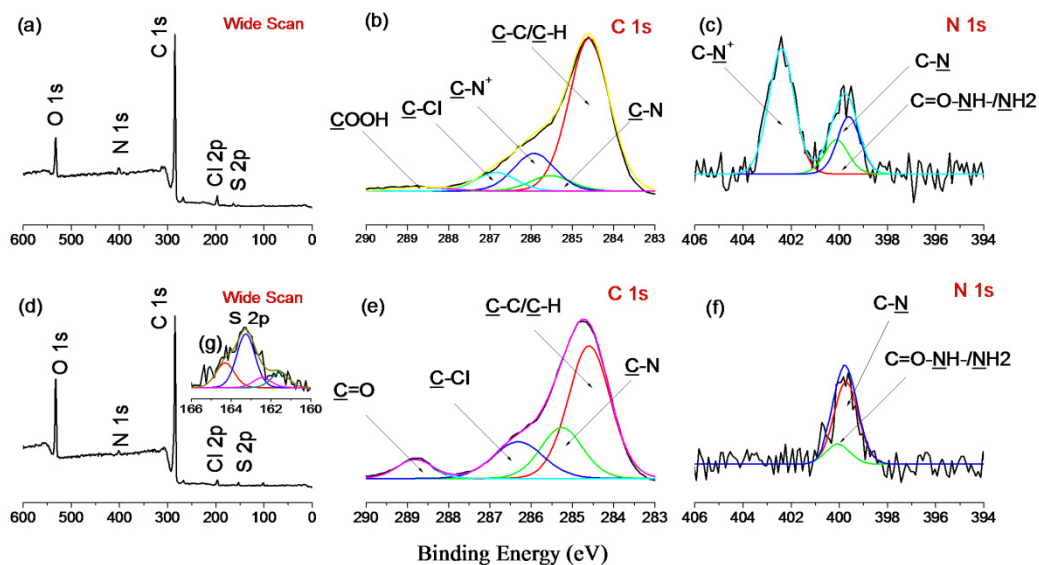

**Figure S2.** XPS (a) wide scan, (b) C 1s and (c) N1s of PVC@TAA-BSA nanoparticles; XPS (d) wide scan, (e) C 1s, (f) N1s and (g) S 2p of PVC@TAA-MIP nanoparticles.

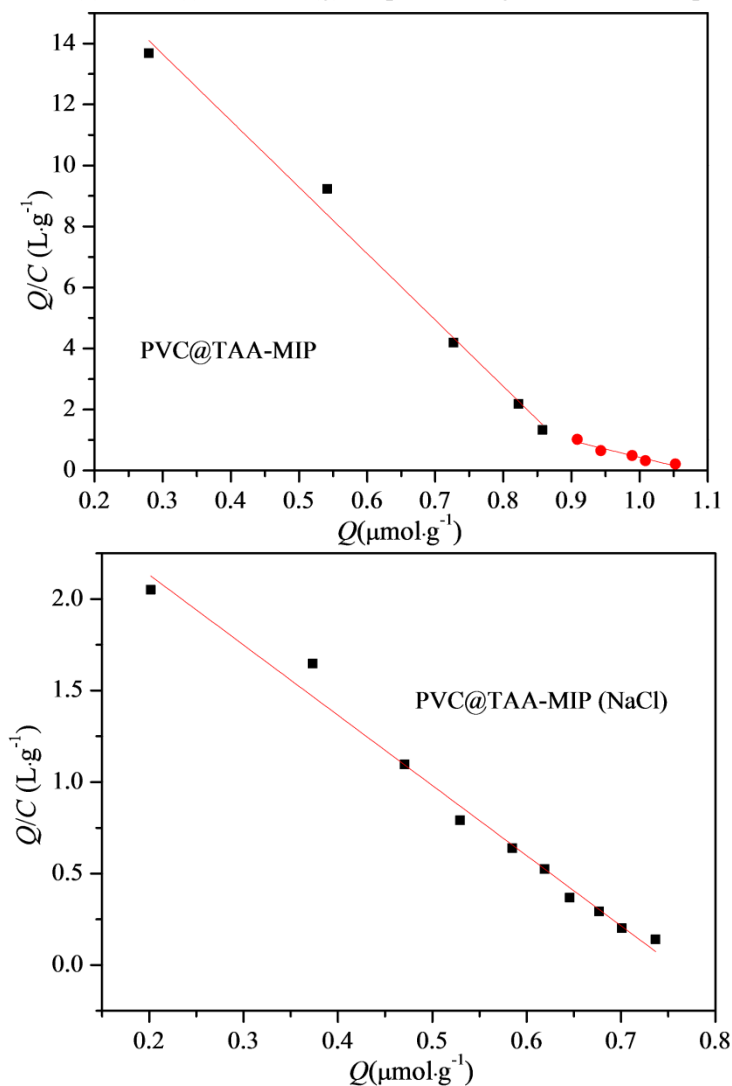

**Figure S3.** The Scatchard plots of PVC@TAA-MIP in the absence (or presence) of NaCl.

**Table S1.** The pore structure and surface area of PVC, PVC@TAA, PVC@TAA-BSA and PVC@TAA-MIP were studied by nitrogen sorption analysis.

| Sorbents    | $S$ ( $\text{m}^2 \cdot \text{g}^{-1}$ ) | $V_p$ ( $\text{cm}^3 \cdot \text{g}^{-1}$ ) | $d_p$ (nm) |
|-------------|------------------------------------------|---------------------------------------------|------------|
| PVC         | 34.87                                    | —                                           | —          |
| PVC@TAA     | 119.63                                   | 1.121                                       | 23.43      |
| PVC@TAA-BSA | 83.41                                    | 1.435                                       | 14.63      |
| PVC@TAA-MIP | 104.59                                   | 1.638                                       | 9.57       |

**Table S2.** Influence of BSA concentration on the zeta-potentials and immobilization capacities of PVC@TAA-BSA.

| Samples concentration ( $\mu\text{M}$ ) | Zeta-potential (mV) | Immobilization capacity ( $\mu\text{mol} \cdot \text{g}^{-1}$ ) |
|-----------------------------------------|---------------------|-----------------------------------------------------------------|
| 1.2                                     | $21.19 \pm 0.40$    | $0.234 \pm 0.0089$                                              |
| 2.4                                     | $13.67 \pm 0.32$    | $0.564 \pm 0.0171$                                              |
| 3.6                                     | $6.28 \pm 0.21$     | $0.768 \pm 0.0234$                                              |
| 4.8                                     | $-11.29 \pm 0.55$   | $0.992 \pm 0.0363$                                              |
| 6.0                                     | $-30.29 \pm 0.74$   | $1.136 \pm 0.0527$                                              |

**Table S3.** Influence of washing solution on the elution efficiency of imprinted materials.

| Washing solution     | Elution efficiency |
|----------------------|--------------------|
| 0.5 M NaCl           | 57.6 %             |
| 1 M NaCl             | 71.4 %             |
| 1 M NaCl + 0.1 M HAc | 79.1 %             |
| 1 M NaCl + 0.2 M HAc | 82.2 %             |
| 1 M NaCl + 0.4 M HAc | 83.6 %             |

**Table S4.** Imprinting efficiency and selectivity coefficients of PVC@TAA-MIP and PVC@TAA-NIP towards BSA in the presence of NaCl.

| Compound | $Q$ ( $\mu\text{mol} \cdot \text{g}^{-1}$ ) |                     | $\alpha$ | $\beta$ |
|----------|---------------------------------------------|---------------------|----------|---------|
|          | PVC@TAA-MIP (NaCl)                          | PVC@TAA-NIP (NaCl)  |          |         |
| BSA      | $0.7662 \pm 0.0201$                         | $0.2574 \pm 0.0102$ | 2.98     | —       |
| OVA      | $0.2284 \pm 0.0162$                         | $0.1967 \pm 0.0188$ | 1.16     | 2.57    |
| Hb       | $0.1752 \pm 0.0230$                         | $0.1693 \pm 0.0156$ | 1.03     | 2.89    |
| Lys      | $0.1190 \pm 0.0241$                         | $0.1064 \pm 0.0079$ | 1.12     | 2.66    |
